# Supplementary material
Source: PubMed Central journal article supplement (PMC3427010)

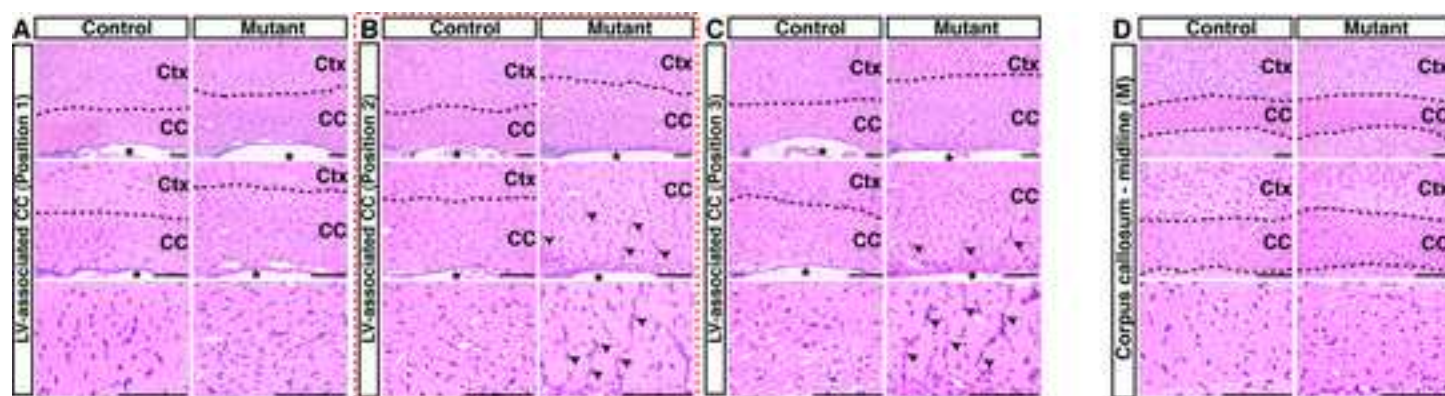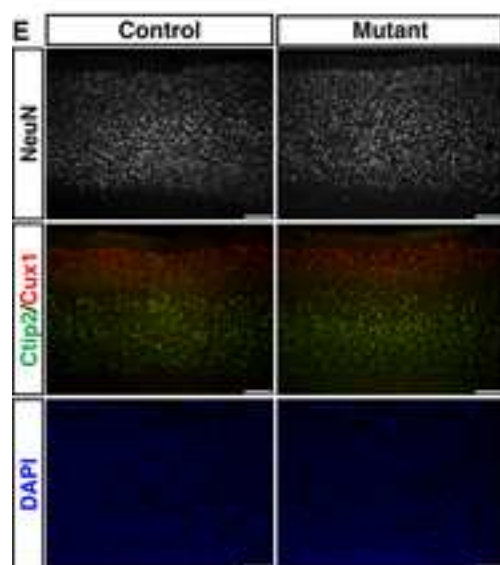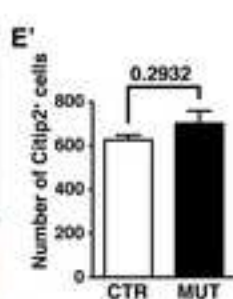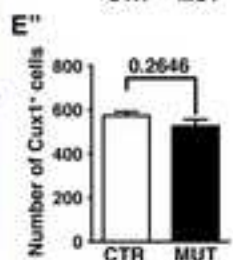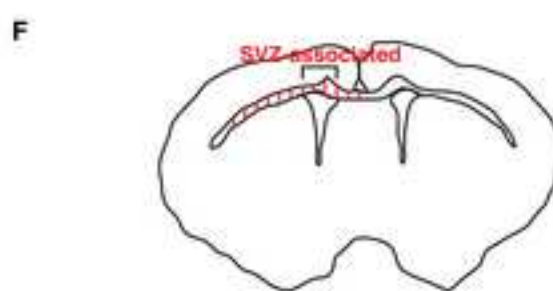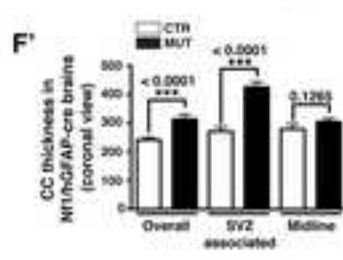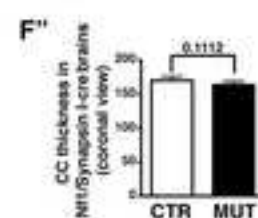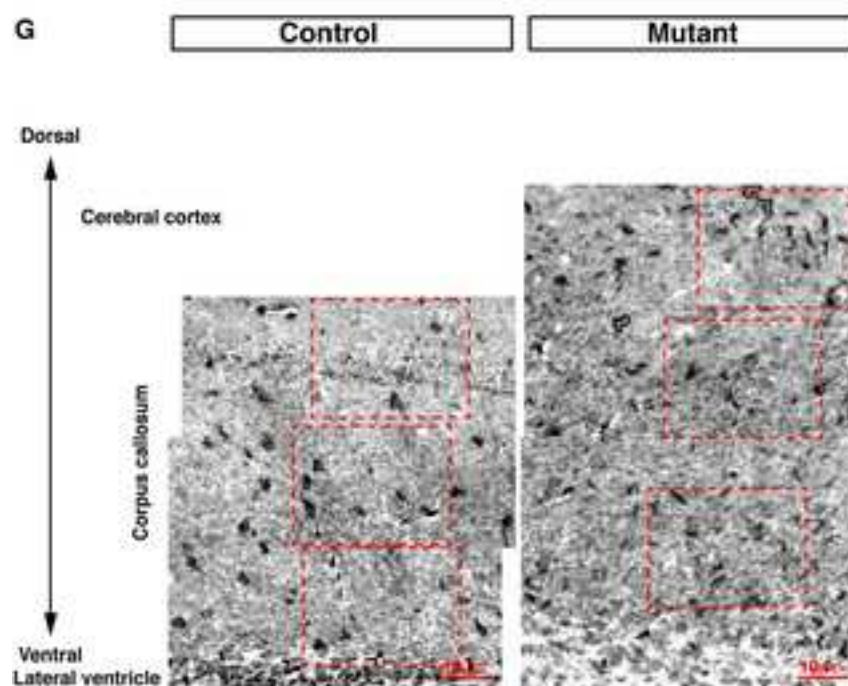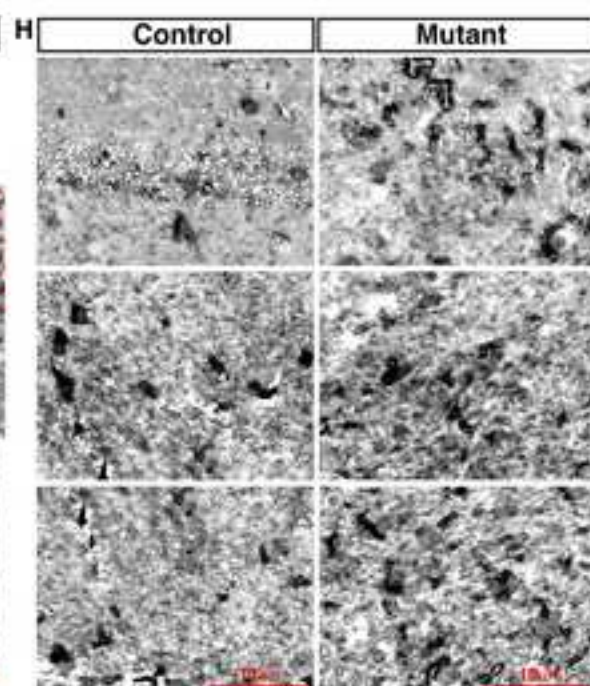

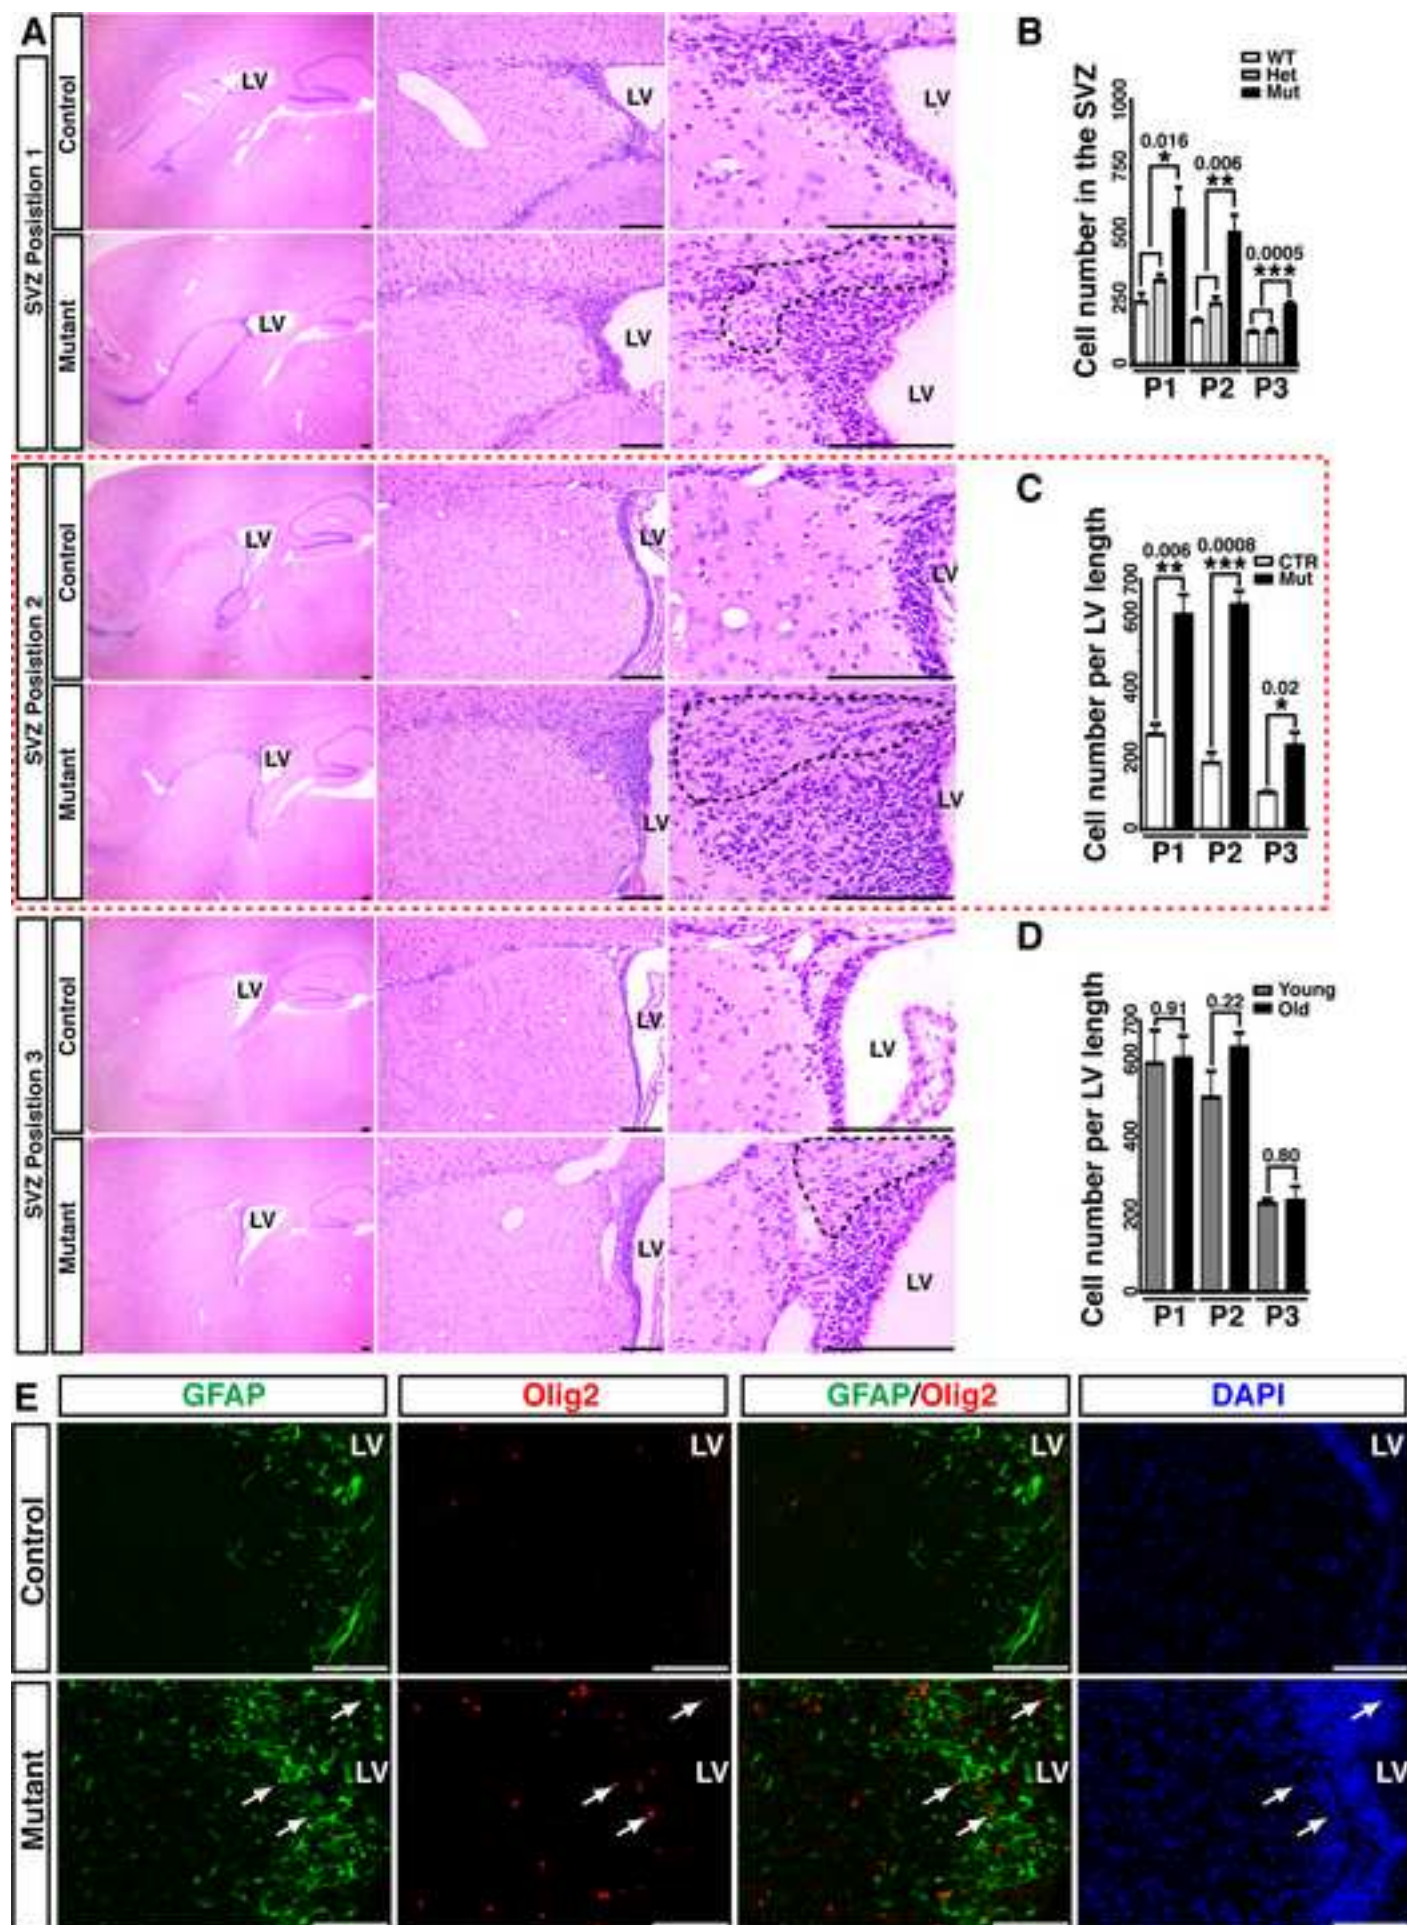

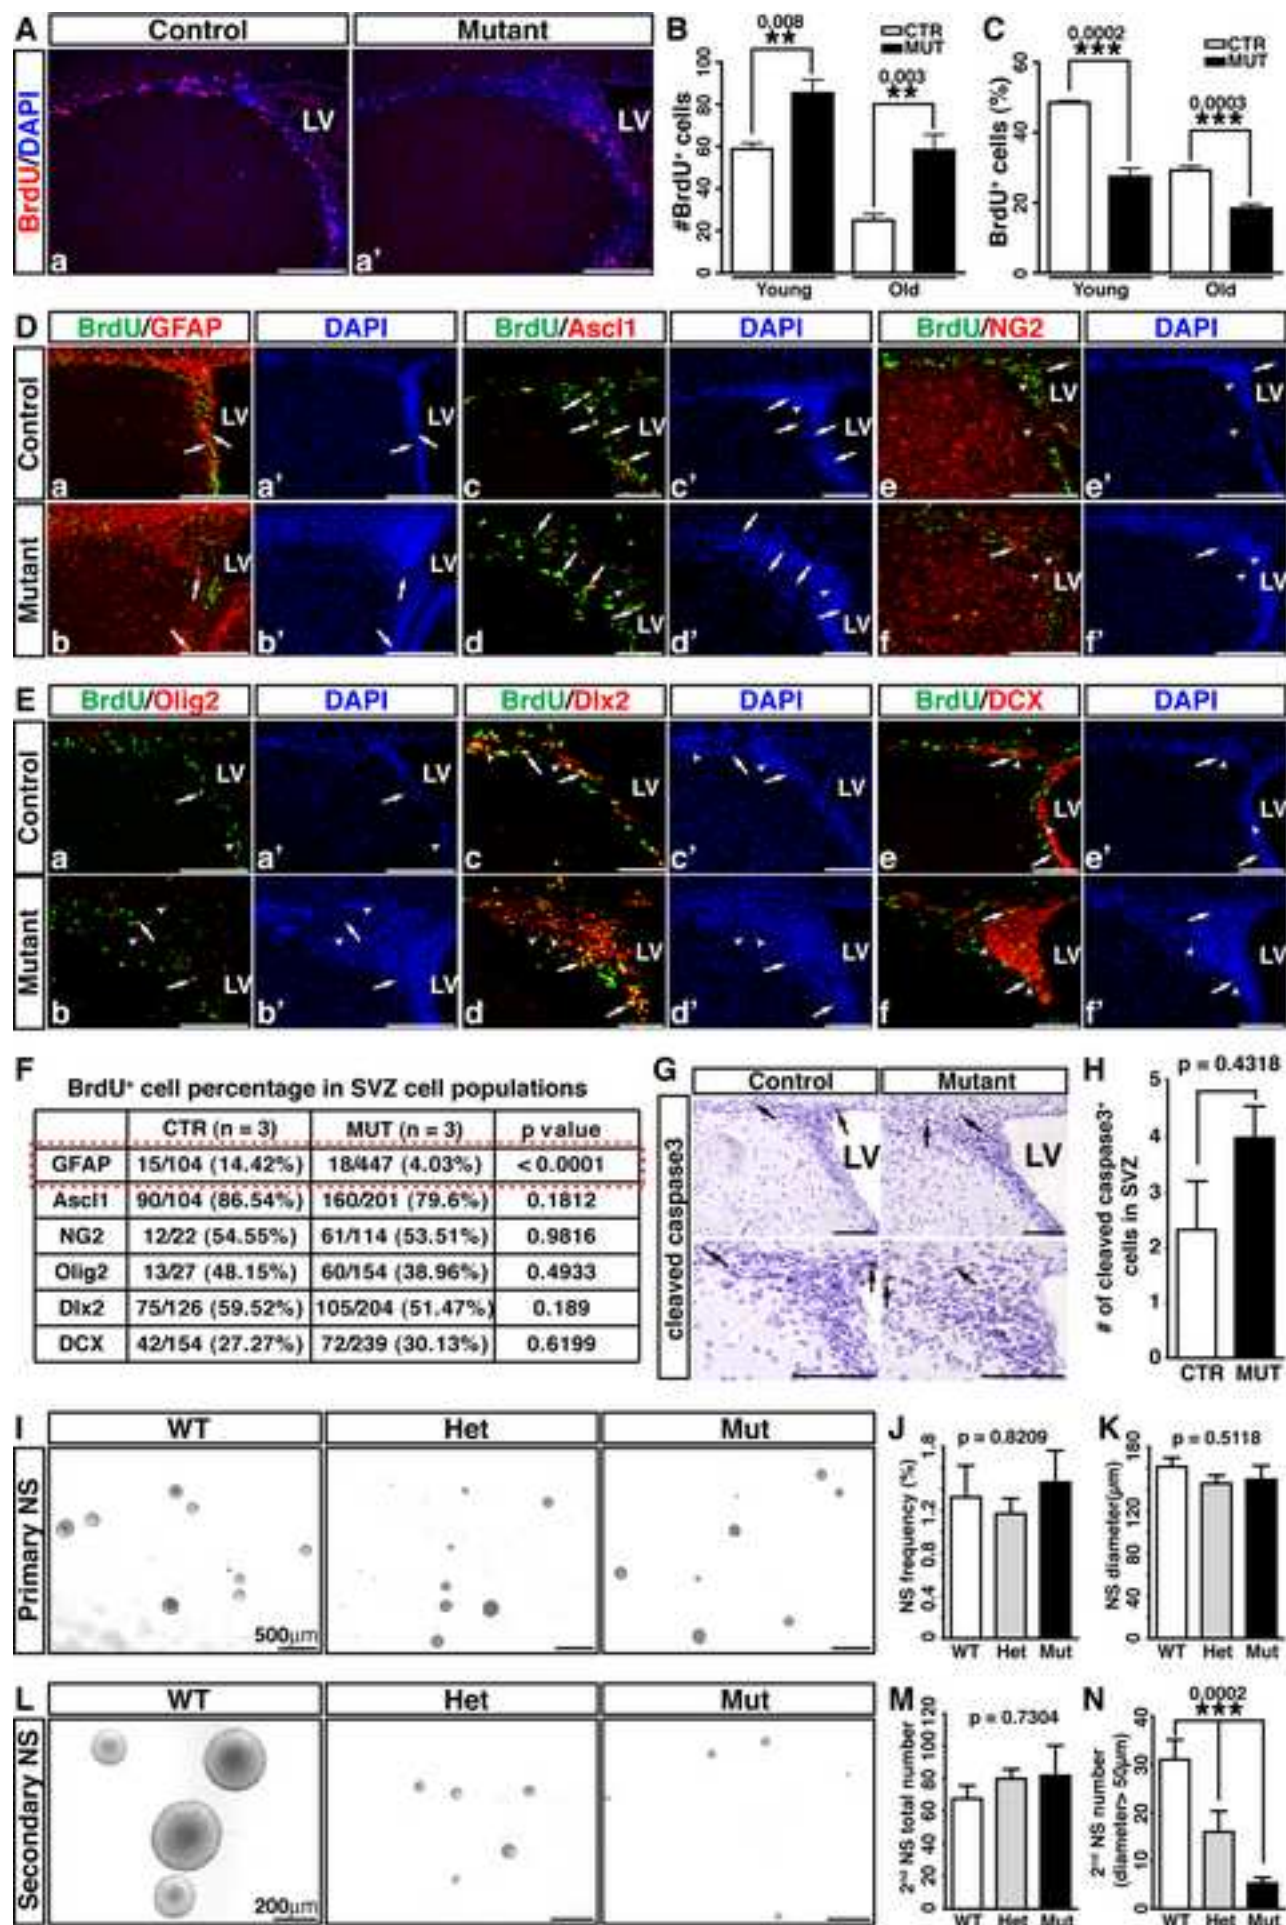

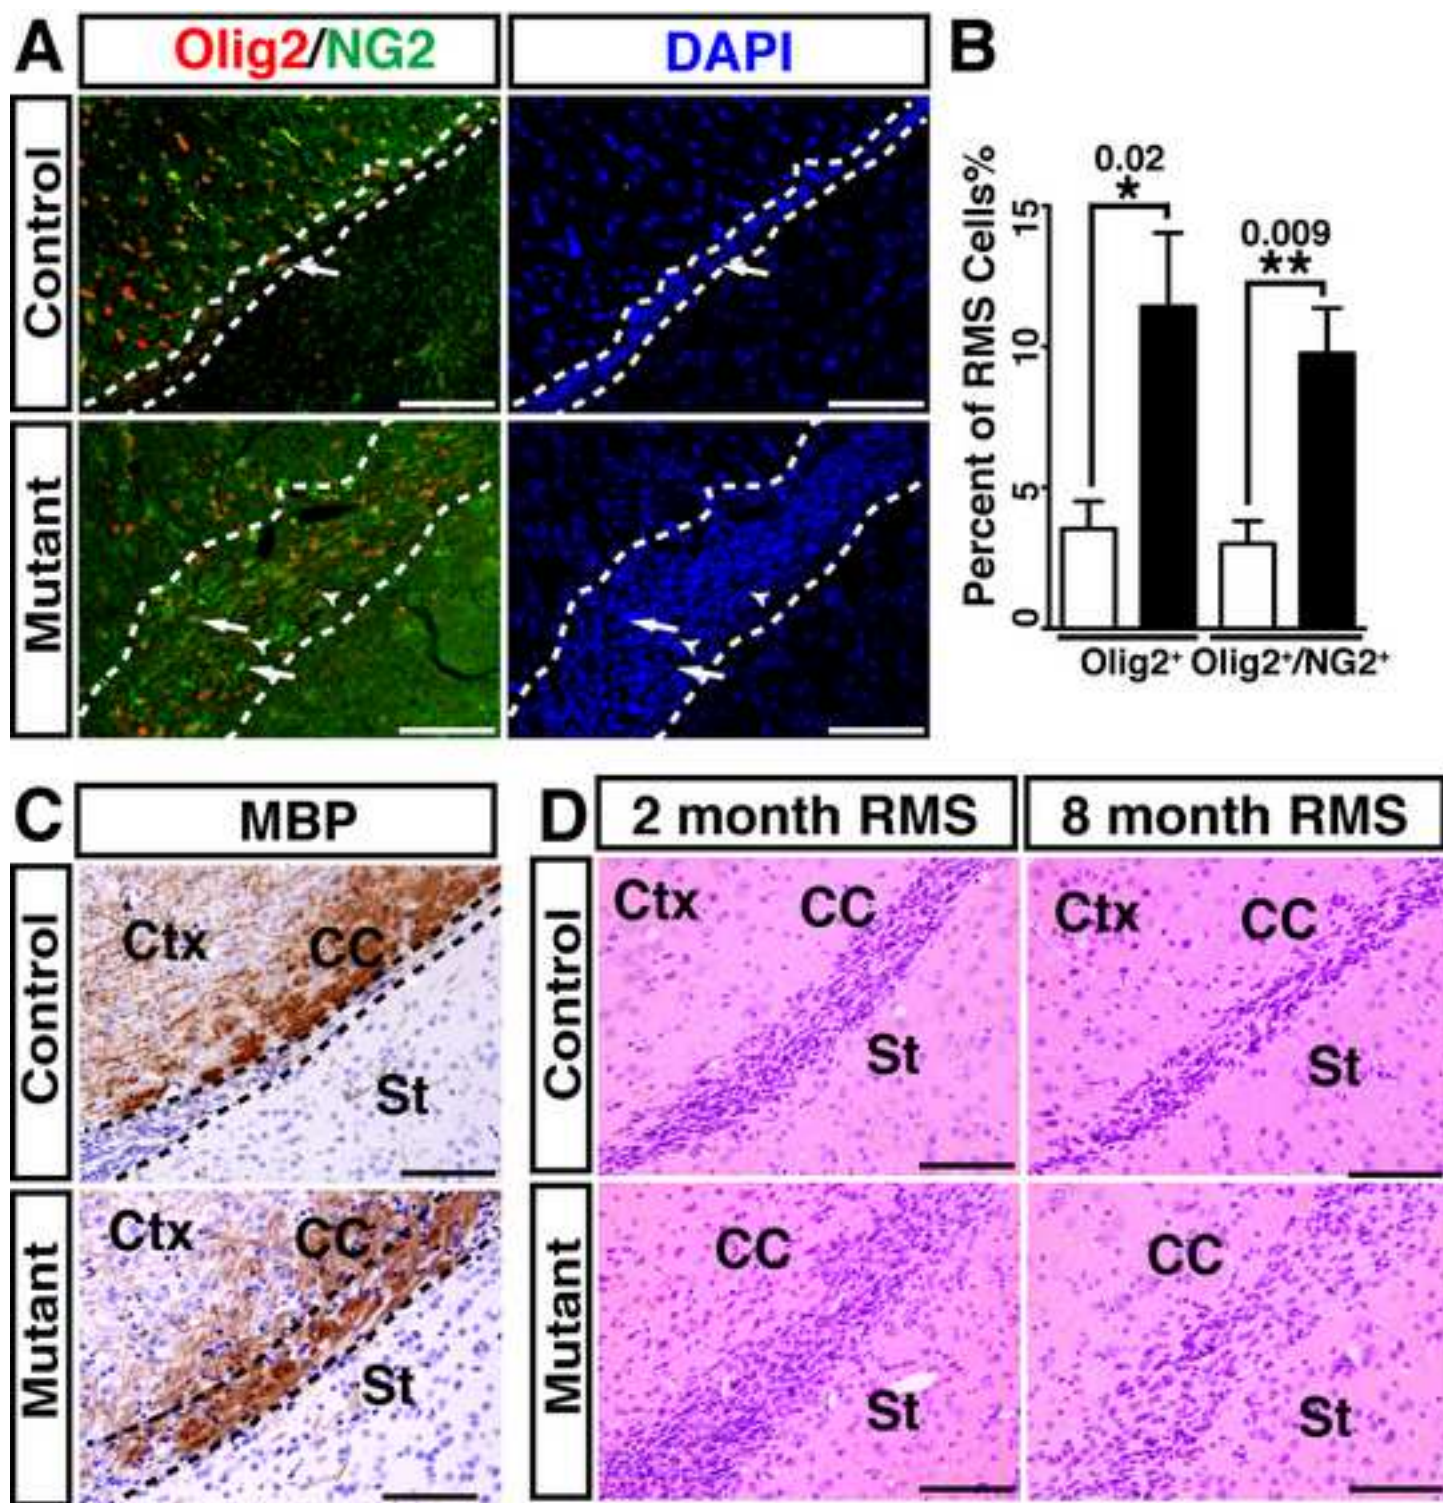

**A**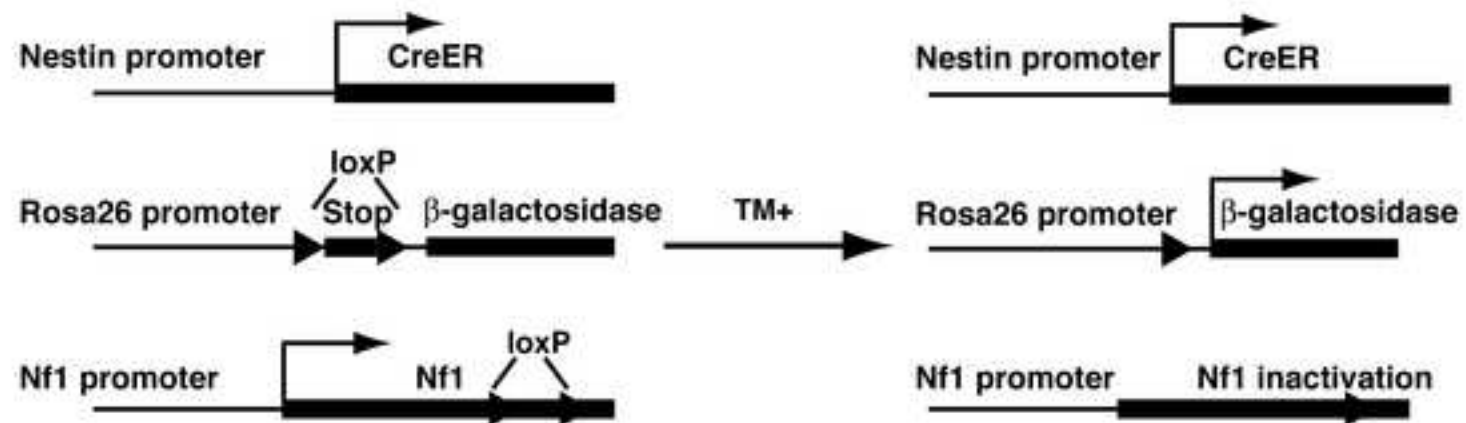**B**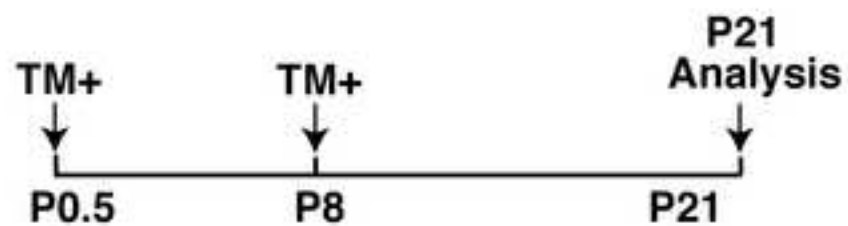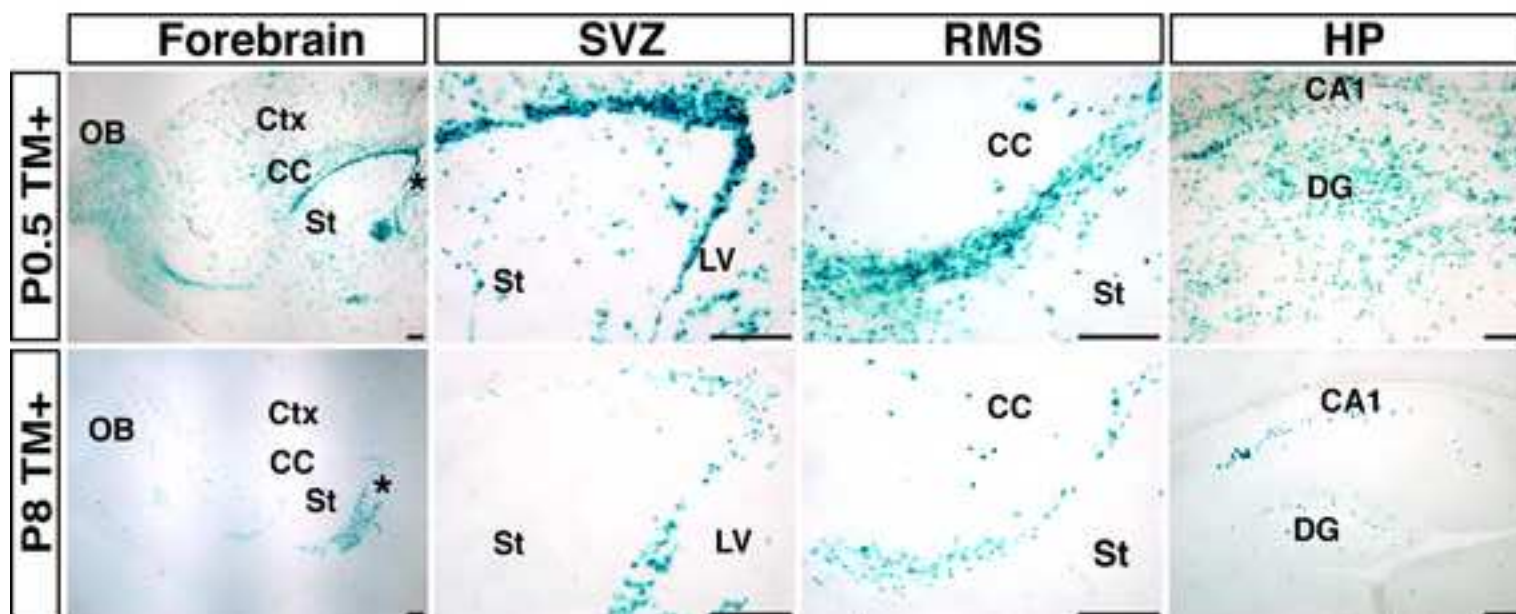

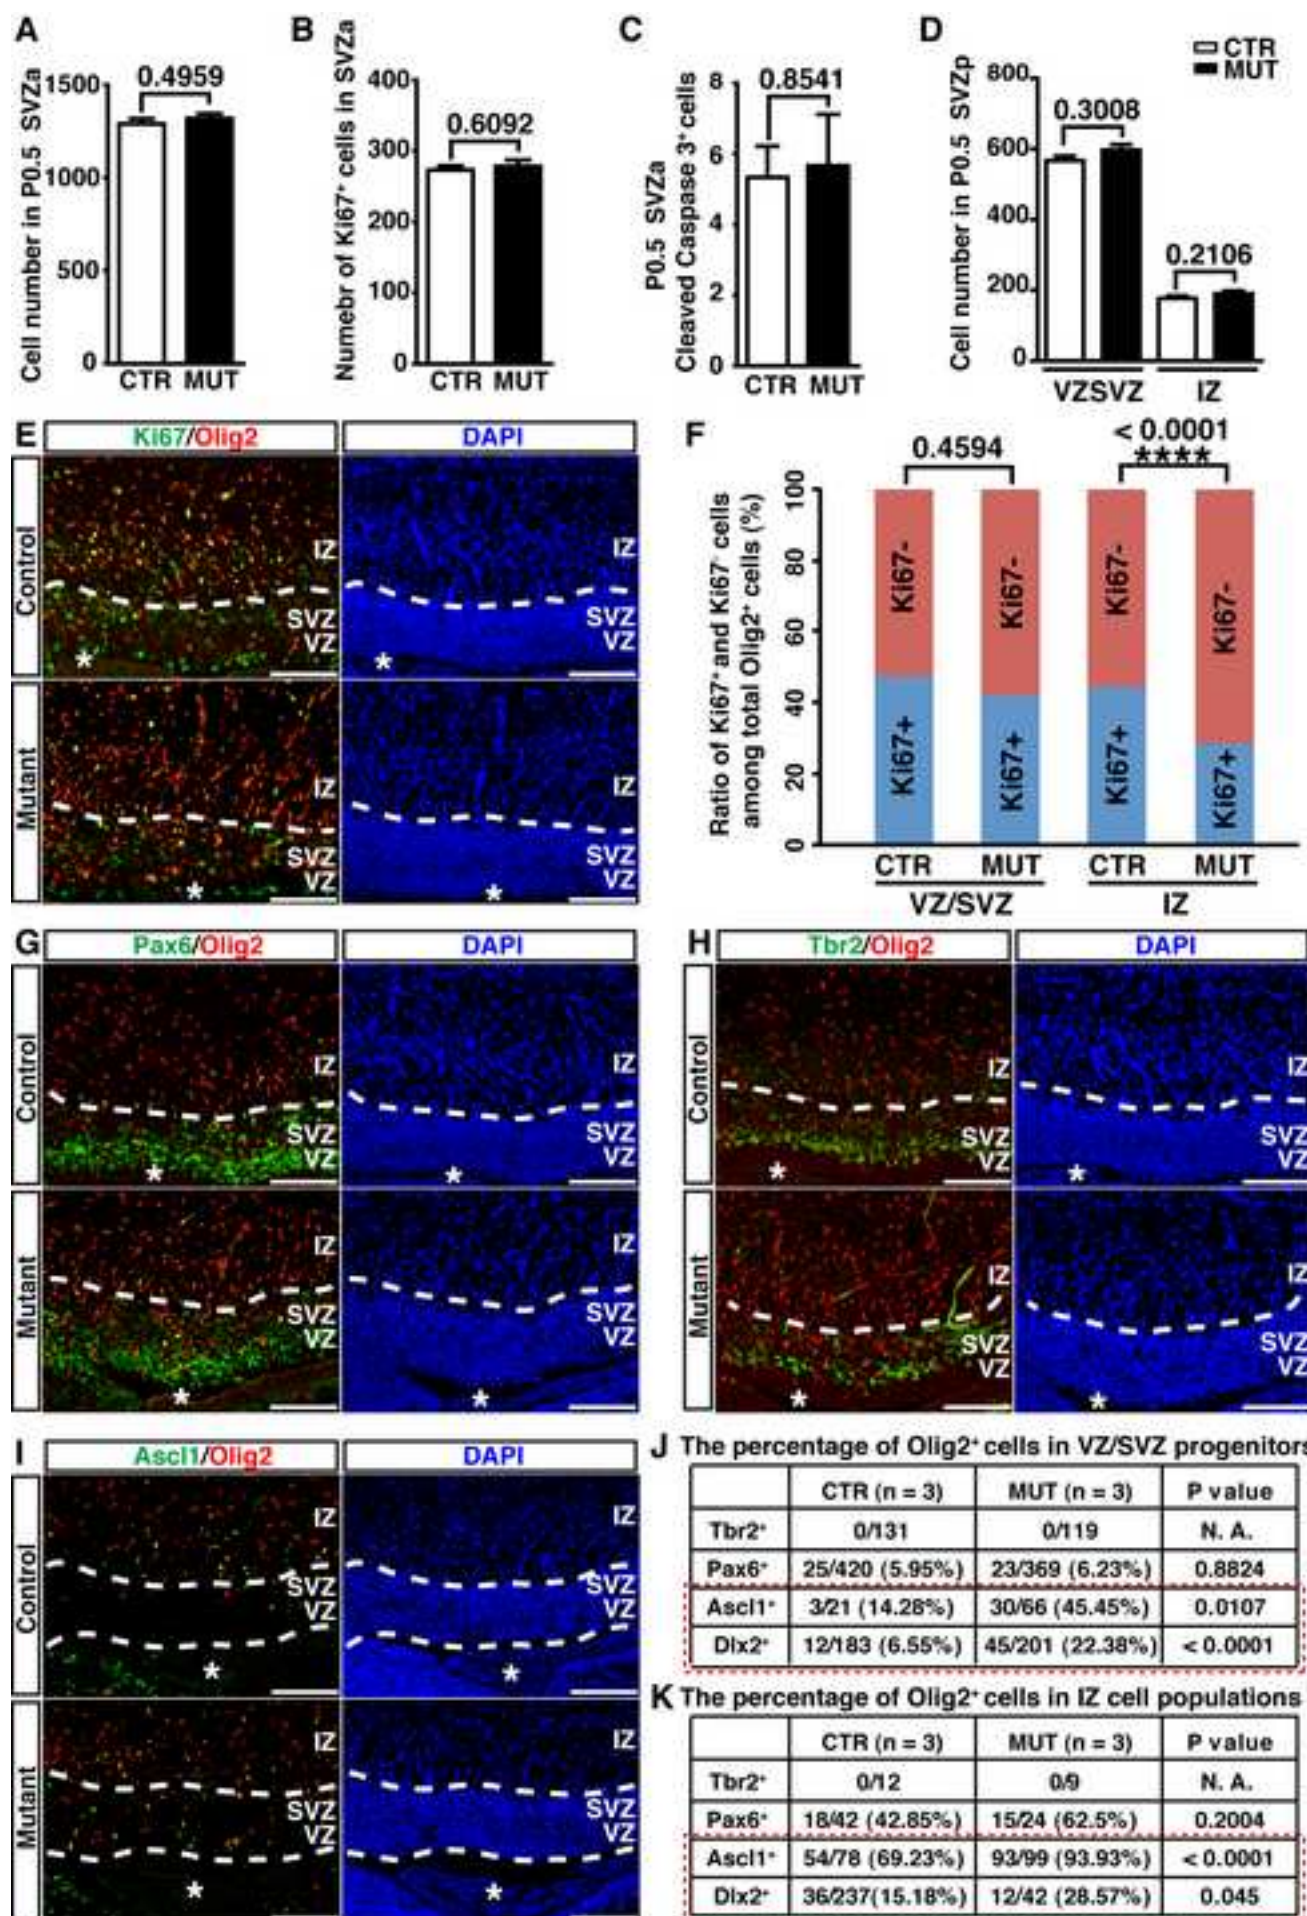

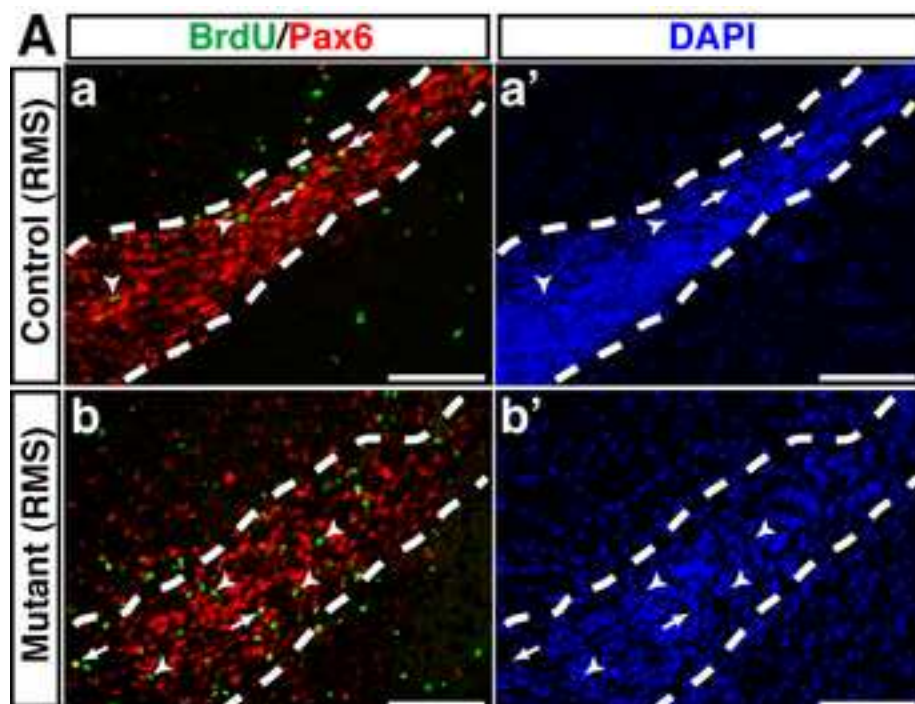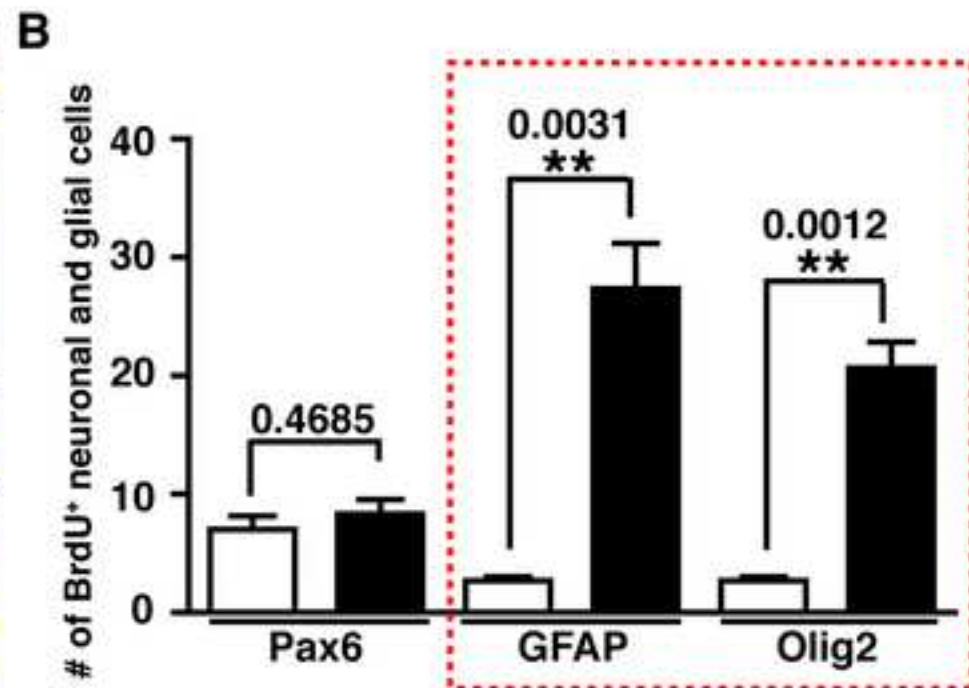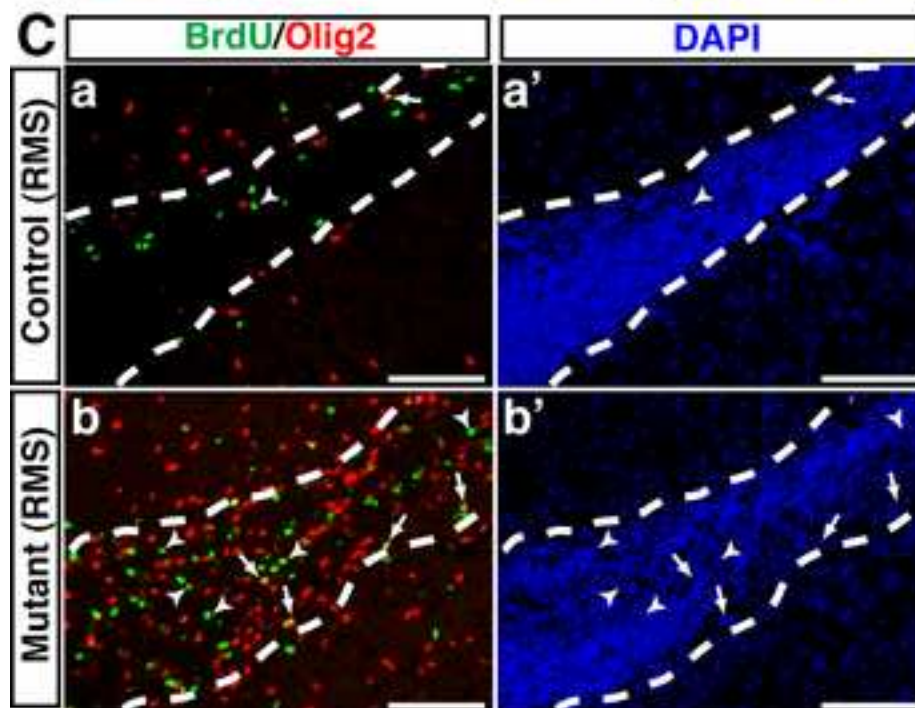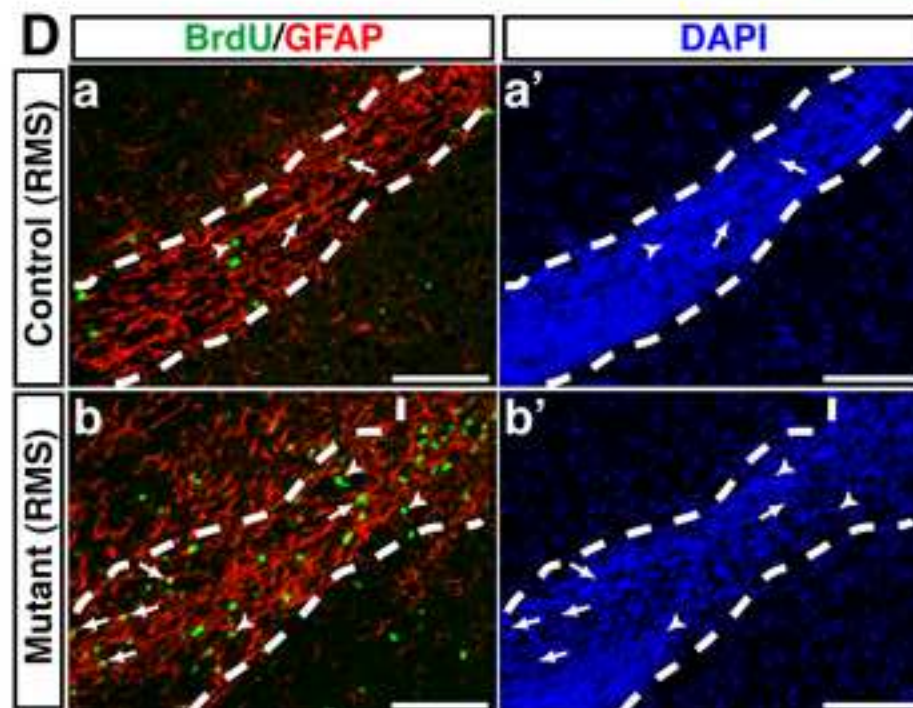

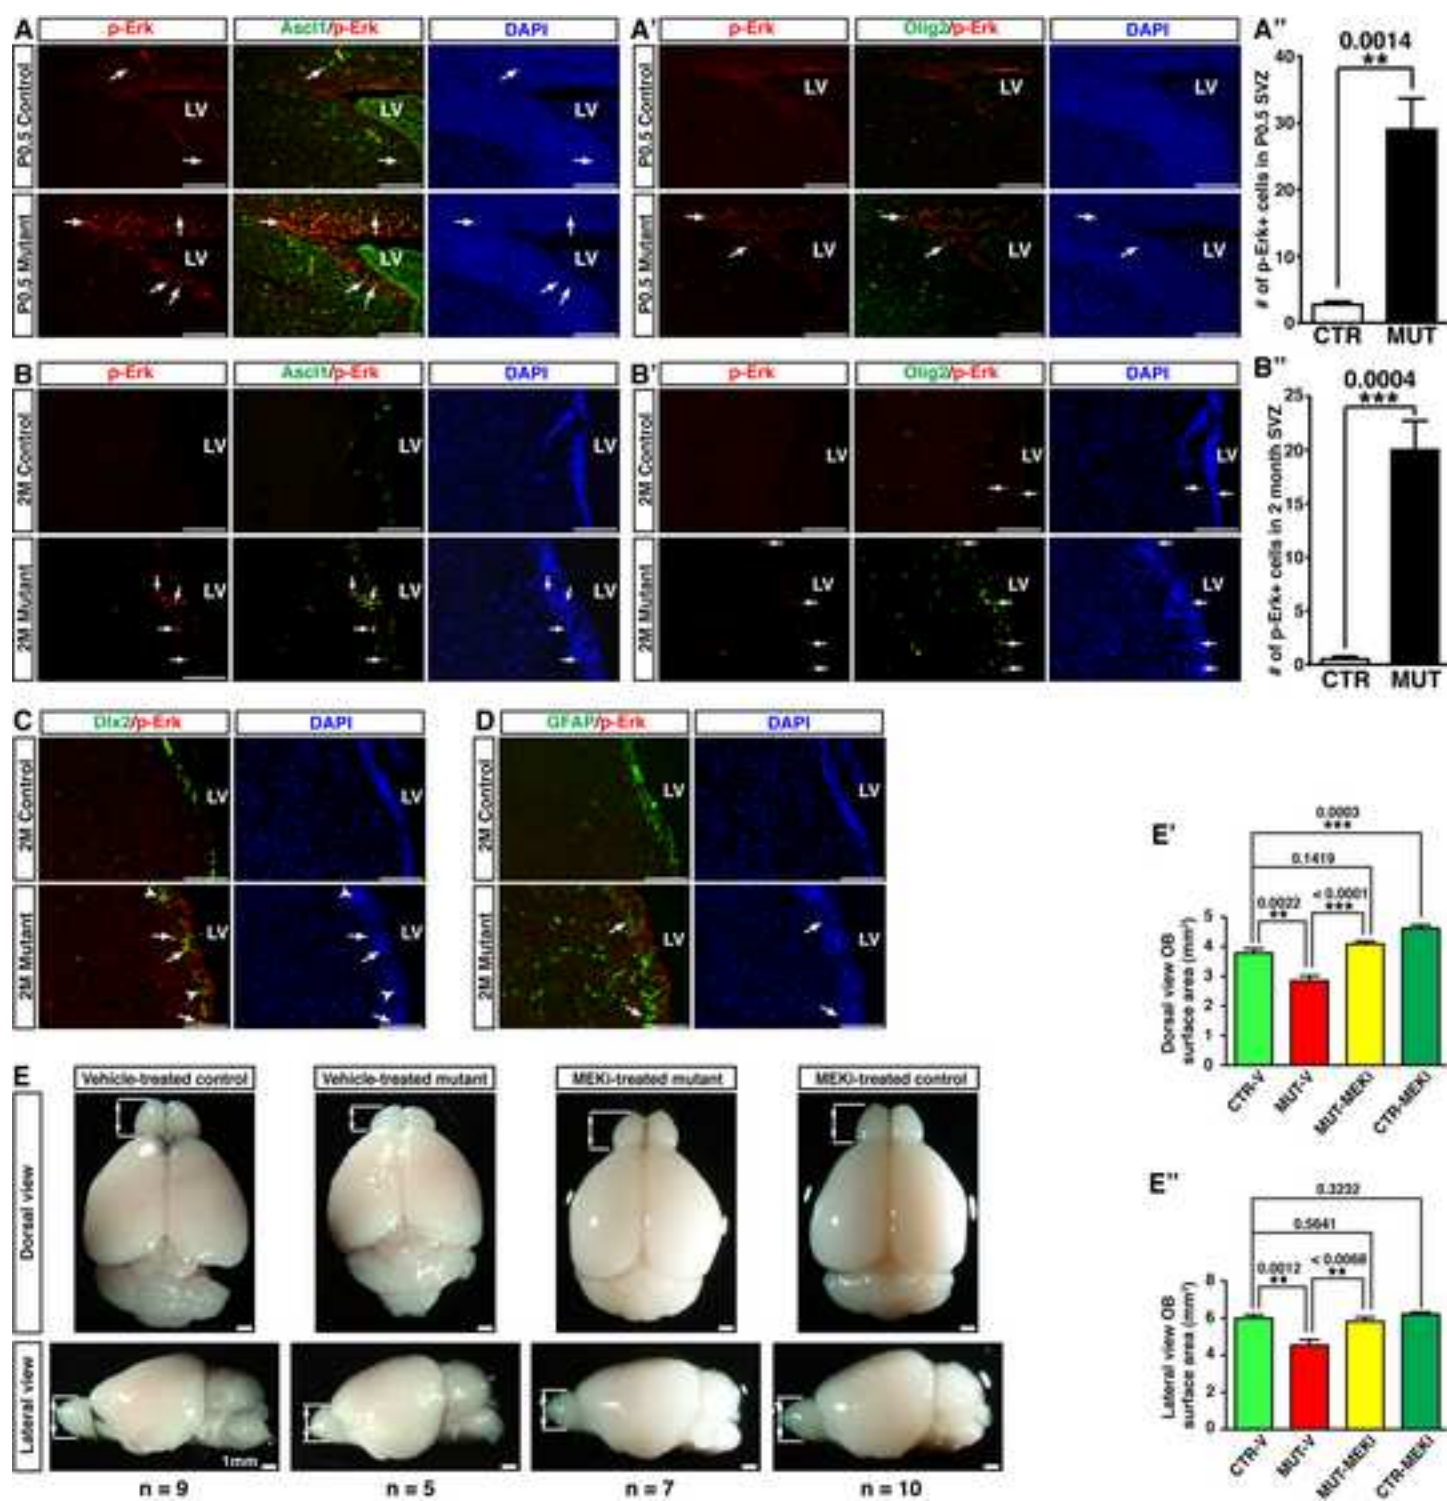

Supplement: NIHMS395796-supplement-02.pdf [file NIHMS395796-supplement-02.pdf]
